# Supplementary material for: Superheated Steam Torrefaction of Biomass Residues with Valorisation of Platform Chemicals Part—2: Economic Assessment and Commercialisation Opportunities
Source: MDPI journal article supplement (doi:10.3390/su14042338), 2022-02-18
Supplement: s1 [file s1]

Archive with 1 entries (1 files):
- sustainability-1603769-supplementary.pdf
