# Supplementary material for: Superheated Steam Torrefaction of Biomass Residues with Valorisation of Platform Chemicals Part—2: Economic Assessment and Commercialisation Opportunities
Source: MDPI journal article supplement (doi:10.3390/su14042338), 2022-02-18
Supplement: s1 [file s1 › sustainability-1603769-supplementary.pdf]

## Direct Investment costs for Reference Case (RC)

### Hand method

| Calculation of direct investment costs |                           |                                                     |                 |
|----------------------------------------|---------------------------|-----------------------------------------------------|-----------------|
| Apparatus and equipment type           | Price for equipment naked | cost multiplication factors $F_E$ per product group | Resulting price |
| Distillation column                    | 4.932 €                   | 4.0                                                 | 19.728 €        |
| Pressure vessel                        | 0 €                       | 4.0                                                 | 0 €             |
| Heat exchanger                         | 33.704 €                  | 3.5                                                 | 117.964 €       |
| Furnace                                | 40.761 €                  | 2.0                                                 | 81.522 €        |
| Pump                                   | 2.780 €                   | 4.0                                                 | 11.120 €        |
| Compressor                             | 0 €                       | 2.5                                                 | 0 €             |
| Instrumentaion                         | 0 €                       | 4.0                                                 | 0 €             |
| Other equipment                        | 312.330 €                 | 2.5                                                 | 780.825 €       |
|                                        |                           |                                                     |                 |
| Total                                  | 394.507.00 €              |                                                     | 1.011.159.00 €  |

| Cost element $F_x$       | Cost factor | of    | Costs          |
|--------------------------|-------------|-------|----------------|
| Direct investment cost   |             |       | 1.011.159.00 € |
| Indirect investment cost | 0.4         | DI    | 404.463.60 €   |
| Process investment cost  | 0.2         | DI+II | 283.124.52 €   |
| Rist supplement          | 0.15        | DI+II | 212.343.39 €   |
|                          |             |       |                |
| Total Hand method        |             |       | 1.911.090.51 € |

### PCR method

| Apparatus and equipment costs |                          |                   |
|-------------------------------|--------------------------|-------------------|
| Category                      | Cost distribution factor | Cost per category |
| Apparatus                     | 39%                      | 394.507 €         |
| Foundations                   | 4%                       | 40.462 €          |
| Insulation                    | 4%                       | 40.462 €          |
| Site work                     | 4%                       | 40.462 €          |
| Buildings                     | 10%                      | 101.156 €         |
| Ductwork                      | 1%                       | 10.116 €          |
| Wiring                        | 8%                       | 80.925 €          |
| Instrumentaion                | 8%                       | 80.925 €          |
| Piping                        | 22%                      | 222.542 €         |
|                               |                          |                   |
|                               |                          | 1.011.556 €       |

| Category                        | Cost distribution factor | Cost per category |
|---------------------------------|--------------------------|-------------------|
| Apparatus and equipment costs   | 28%                      | 1.011.556 €       |
| Process design costs            | 7.5%                     | 270.953 €         |
| Electrical & control            | 2%                       | 72.254 €          |
| Indirect site costs             | 5%                       | 180.635 €         |
| Staff costs construction site   | 5%                       | 180.635 €         |
| Material cost construction site | 5%                       | 180.635 €         |
|                                 |                          |                   |
| Total PCR method                |                          | 1.896.668 €       |

## Direct Investment costs for Process Variant (PV)

### Hand method

#### Calculation of direct investment costs

| Apparatus and equipment type | Price for equipment naked | cost multiplication factors<br>F <sub>E</sub> per product group | Resulting price       |
|------------------------------|---------------------------|-----------------------------------------------------------------|-----------------------|
| Distillation column          | 4.932 €                   | 4.0                                                             | 19.728 €              |
| Pressure vessel              | 0 €                       | 4.0                                                             | 0 €                   |
| Heat exchanger               | 53.949 €                  | 3.5                                                             | 188.822 €             |
| Furnace                      | 742.751 €                 | 2.0                                                             | 1.485.502 €           |
| Pump                         | 2.780 €                   | 4.0                                                             | 11.120 €              |
| Compressor                   | 0 €                       | 2.5                                                             | 0 €                   |
| Instrumentaion               | 0 €                       | 4.0                                                             | 0 €                   |
| Other equipment              | 292.569 €                 | 2.5                                                             | 731.423 €             |
|                              |                           |                                                                 |                       |
| <b>Total</b>                 | <b>1.096.981.00 €</b>     |                                                                 | <b>2.436.594.00 €</b> |

| Cost element F <sub>x</sub> | Cost factor | of    | Costs                 |
|-----------------------------|-------------|-------|-----------------------|
| Direct investment cost      |             |       | 2.436.594.00 €        |
| Indirect investment cost    | 0.3         | DI    | 730.978.20 €          |
| Process investment cost     | 0.15        | DI+II | 475.135.83 €          |
| Rist supplement             | 0.1         | DI+II | 316.757.22 €          |
|                             |             |       |                       |
| <b>Total Hand method</b>    |             |       | <b>3.959.465.25 €</b> |

### PCR method

#### Apparatus and equipment costs

| Category       | Cost distribution factor | Cost per category  |
|----------------|--------------------------|--------------------|
| Apparatus      | 39%                      | 1.096.981 €        |
| Foundations    | 4%                       | 112.511 €          |
| Insulation     | 4%                       | 112.511 €          |
| Site work      | 4%                       | 112.511 €          |
| Buildings      | 10%                      | 281.277 €          |
| Ductwork       | 1%                       | 28.128 €           |
| Wiring         | 8%                       | 225.022 €          |
| Instrumentaion | 8%                       | 225.022 €          |
| Piping         | 22%                      | 618.810 €          |
|                |                          |                    |
|                |                          | <b>2.812.772 €</b> |

| Category                        | Cost distribution factor | Cost per category  |
|---------------------------------|--------------------------|--------------------|
| Apparatus and equipment costs   | 28%                      | 2.812.772 €        |
| Process design costs            | 3.8%                     | 376.711 €          |
| Electrical & control            | 1.5%                     | 150.684 €          |
| Indirect site costs             | 2.5%                     | 251.140 €          |
| Staff costs construction site   | 2.5%                     | 254.154 €          |
| Material cost construction site | 2.5%                     | 254.154 €          |
|                                 |                          |                    |
| <b>Total PCR method</b>         |                          | <b>4.099.615 €</b> |
